# Supplementary material for: Patients’ and public views and attitudes towards the sharing of health data for research: a narrative review of the empirical evidence
Source: PubMed Central journal article supplement — J Med Ethics. 2019 Nov 12;48(1):3–13. doi: 10.1136/medethics-2019-105651 (PMC8717474; doi:10.1136/medethics-2019-105651), 2019-11-12
Supplement: medethics-2019-105651supp001.pdf [file medethics-2019-105651supp001.pdf]

**Appendix I. Literature search (performed April 2019)**

| Database       | Search string                                                                                                                                                                                                                                                                                                                                                                                                                                                                  | #hits |
|----------------|--------------------------------------------------------------------------------------------------------------------------------------------------------------------------------------------------------------------------------------------------------------------------------------------------------------------------------------------------------------------------------------------------------------------------------------------------------------------------------|-------|
| PubMed         | (((((patient*[Title/Abstract] OR public*[Title/Abstract] OR citizen*[Title/Abstract])) AND (view*[Title/Abstract] OR attitude*[Title/Abstract] OR perspective*[Title/Abstract] OR opinion*[Title/Abstract] OR interview*[Title/Abstract] OR qualitative[Title/Abstract] OR survey*[Title/Abstract] OR questionnaire*[Title/Abstract]))) AND ("data sharing"[Title/Abstract] OR "data access"[Title/Abstract] OR "data transfer"[Title/Abstract])) AND research[Title/Abstract] | 318   |
| Scopus         | TITLE-ABS ( patient* OR public OR citizen* ) AND TITLE-ABS ( view* OR perspective* OR attitude* OR opinion* OR interview* OR qualitative OR questionnaire* OR survey* ) AND TITLE-ABS ( "data sharing" OR "data access" OR "data transfer" ) AND TITLE-ABS ( research )                                                                                                                                                                                                        | 395   |
| Embase         | (patient*:ab,ti OR public:ab,ti OR citizen*:ab,ti) AND (attitude*:ab,ti OR view*:ab,ti OR perspective*:ab,ti OR opinion*:ab,ti OR interview*:ab,ti OR qualitative:ab,ti OR survey*:ab,ti OR questionnaire*:ab,ti) AND ('data sharing':ab,ti OR 'data access':ab,ti OR 'data transfer':ab,ti) AND research:ab,ti                                                                                                                                                                | 355   |
| Google Scholar | allintitle: patient data perspectives OR attitudes OR views OR opinions                                                                                                                                                                                                                                                                                                                                                                                                        | 85    |
